# Supplementary material for: A simple and reversible fluorescent probe based on NBD for rapid detection of hypochlorite and its application for bioimaging
Source: Royal Society of Chemistry journal article supplement (doi:10.1039/c5ra15373e), 2015-01-01

## Supporting Information

### **A Simple and Reversible Fluorescent Probe Based on NBD for Rapid Detection of Hypochlorite and Its Application for Bioimaging**

Youming Shen,<sup>ab</sup> Xiangyang Zhang,<sup>\*a</sup> Xi Huang,<sup>b</sup> Siyu Wen,<sup>a</sup> Mingdi Liu,<sup>a</sup> Yan Deng,<sup>a</sup> Youyu Zhang,<sup>\*b</sup> Chunxiang Zhang,<sup>a</sup> Junling Jin,<sup>a</sup> Haitao Li,<sup>b</sup> and Shouzhuo Yao<sup>b</sup>

<sup>a</sup> College of Chemistry and Chemical Engineering, Hunan University of Arts and Science, ChangDe, 415000, PR China E-mail: zhangxiangy06@163.com

<sup>b</sup> Key Laboratory of Chemical Biology and Traditional Chinese Medicine Research (Ministry of Education), College of Chemistry and Chemical Engineering, Hunan Normal University, Changsha 410081, PR China E-mail: zhangyy@hunnu.edu.cn

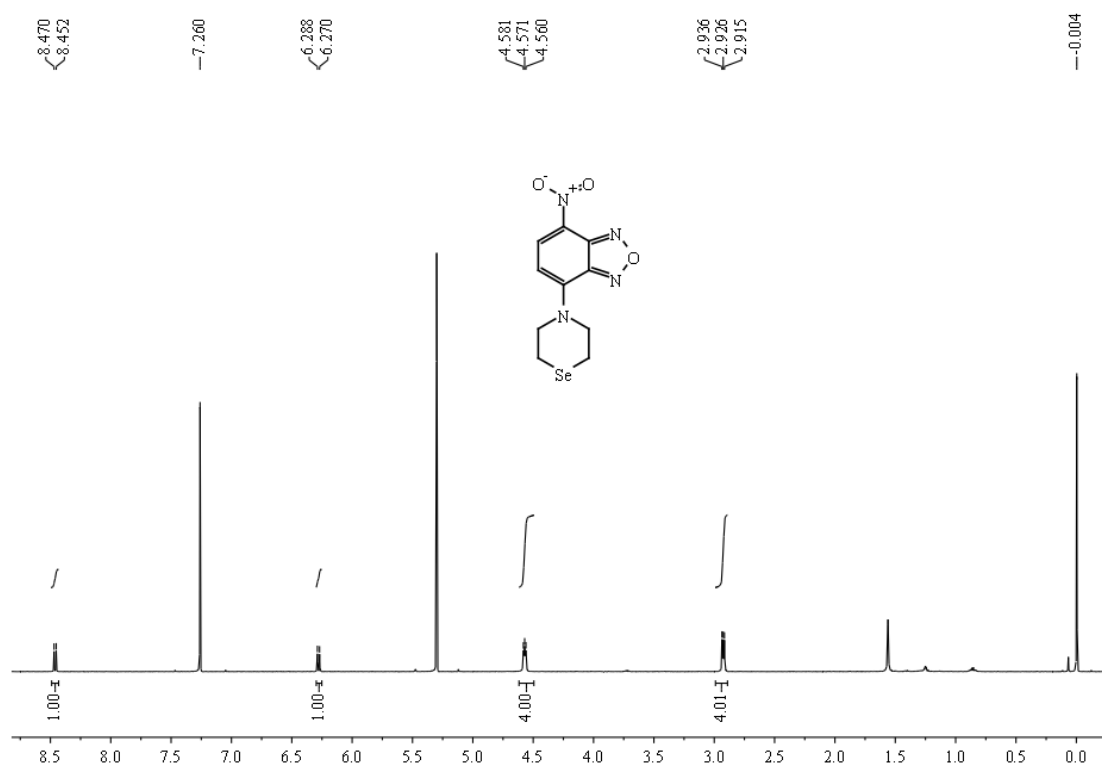



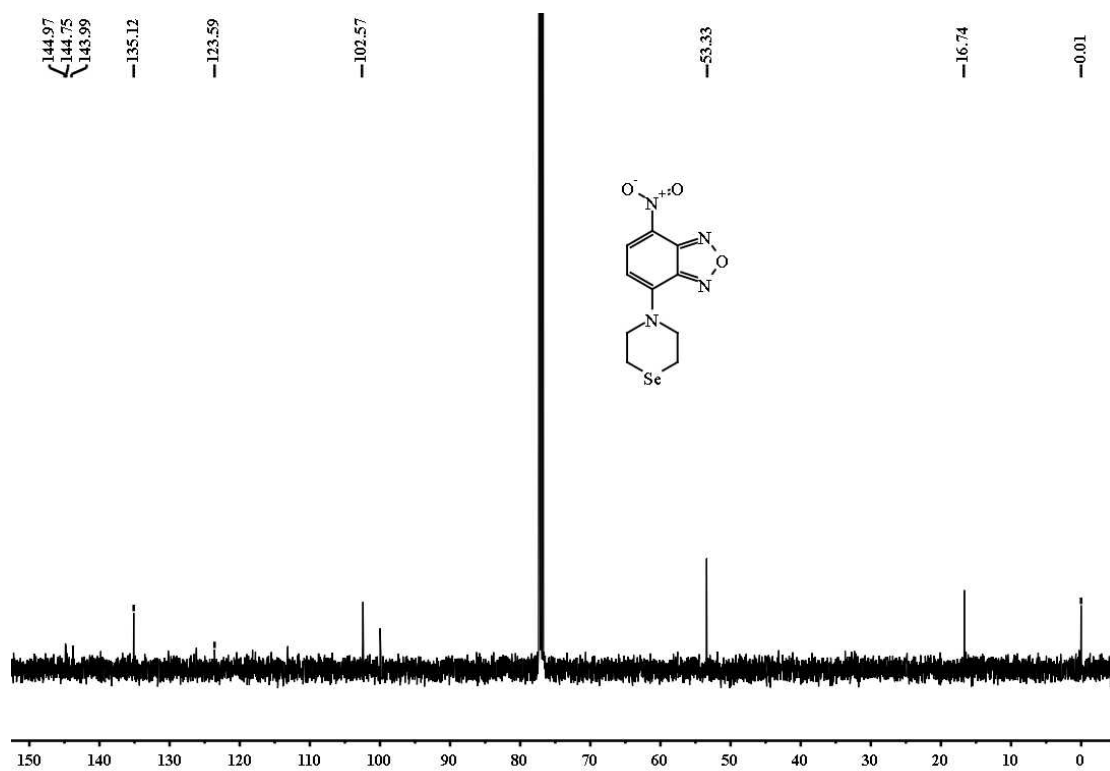



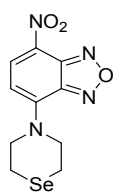

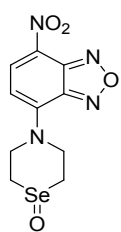

Supplement: c5ra15373e1.pdf [file c5ra15373e1.pdf]
